# Supplementary material for: Bacteria and tumours: causative agents or opportunistic inhabitants?
Source: Springer Nature journal article supplement (doi:10.1186/1750-9378-8-11), 2013-03-28

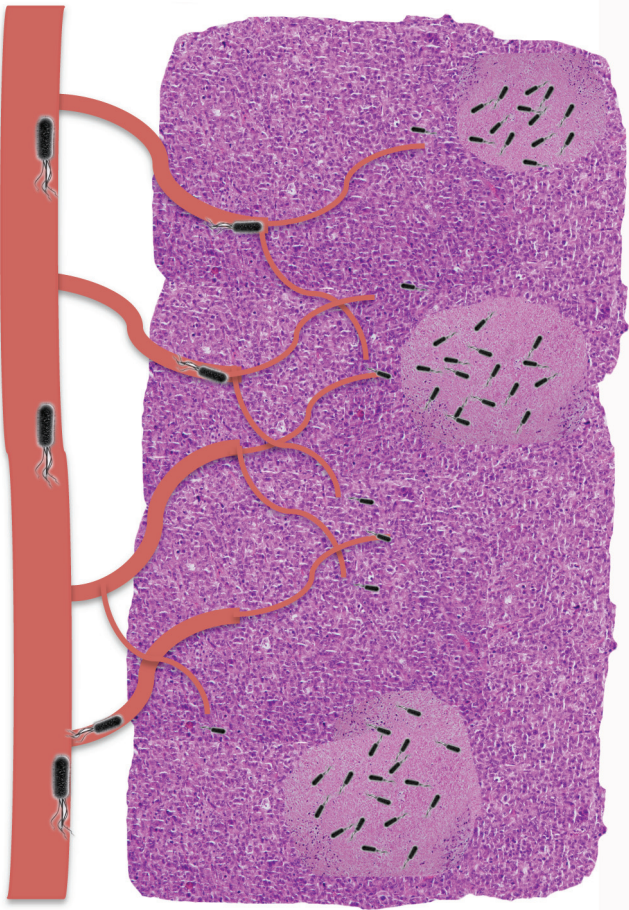

Supplement: 13027_2012_436_MOESM1_ESM.pdf [file 13027_2012_436_MOESM1_ESM.pdf]
